# Supplementary material for: Impact of the Peptide WMR-K on Dual-Species Biofilm Candida albicans/Klebsiella pneumoniae and on the Untargeted Metabolomic Profile
Source: PubMed Central journal article supplement (PMC7920046; doi:10.3390/pathogens10020214), 2021-02-16
Supplement: pathogens-10-00214-s001.pdf [file pathogens-10-00214-s001.pdf]

# Impact of the peptide WMR-K on dual-species biofilm *Candida albicans*/*Klebsiella pneumoniae* and on the untargeted metabolomic profile

Emilia Galdiero <sup>1</sup>, Maria Michela Salvatore <sup>2\*</sup>, Angela Maione <sup>1</sup>, Federica Carraturo <sup>1</sup>, Stefania Galdiero <sup>3</sup>, Annarita Falanga <sup>4</sup>, Anna Andolfi <sup>2,5</sup>, Francesco Salvatore <sup>2</sup> and Marco Guida <sup>1</sup>

<sup>1</sup> Department of Biology, University of Naples 'Federico II', via Cinthia, 80126, Naples, Italy; [angela.maione@unina.it](mailto:angela.maione@unina.it) (A.M.); [federica.carraturo@unina.it](mailto:federica.carraturo@unina.it) (F.C.); [marco.guida@unina.it](mailto:marco.guida@unina.it) (M.G.); [egaldier@unina.it](mailto:egaldier@unina.it) (E.G.)

<sup>2</sup> Department of Chemical Sciences, University of Naples 'Federico II', via Cinthia, 80126 Naples, Italy; [andolfi@unina.it](mailto:andolfi@unina.it) (A.A.); [frsalvat@unina.it](mailto:frsalvat@unina.it) (F.S.)

<sup>3</sup> Department of Pharmacy, School of Medicine, University of Naples 'Federico II', Via Domenico Montesano 49, 80131 Naples, Italy; [sgaldier@unina.it](mailto:sgaldier@unina.it) (S.G.)

<sup>4</sup> Department of Agricultural Science, University of Naples 'Federico II', Via dell' Università 100, 80055, Portici, Naples, Italy; [annarita.falanga@unina.it](mailto:annarita.falanga@unina.it) (A.F.)

<sup>5</sup> BAT Center – Interuniversity Center for Studies on Bioinspired Agro-Environmental Technology, University of Naples 'Federico II', Portici (NA), 80055, Italy

\* Correspondence: [mariamichela.salvatore@unina.it](mailto:mariamichela.salvatore@unina.it) (M.M.S.)

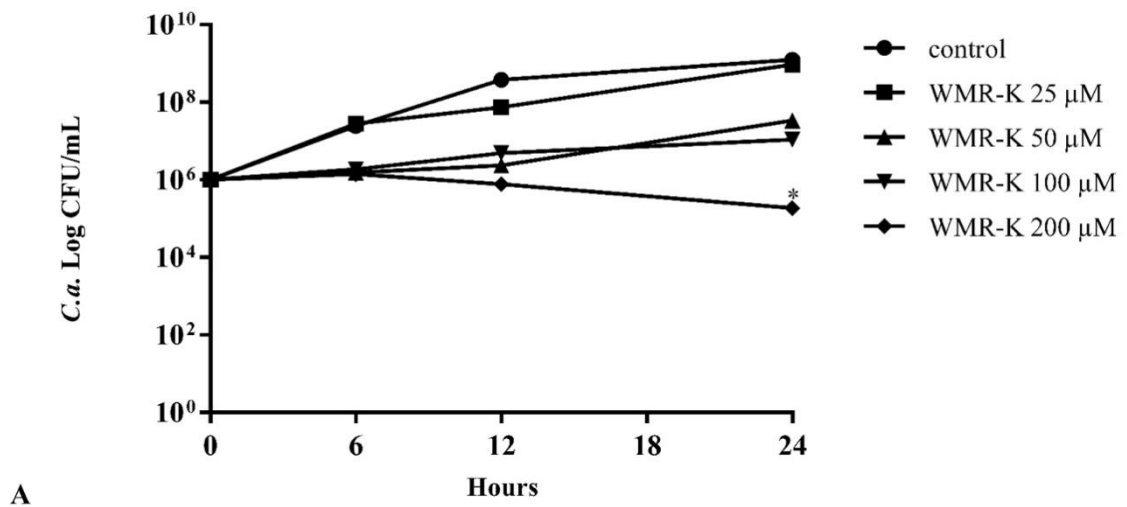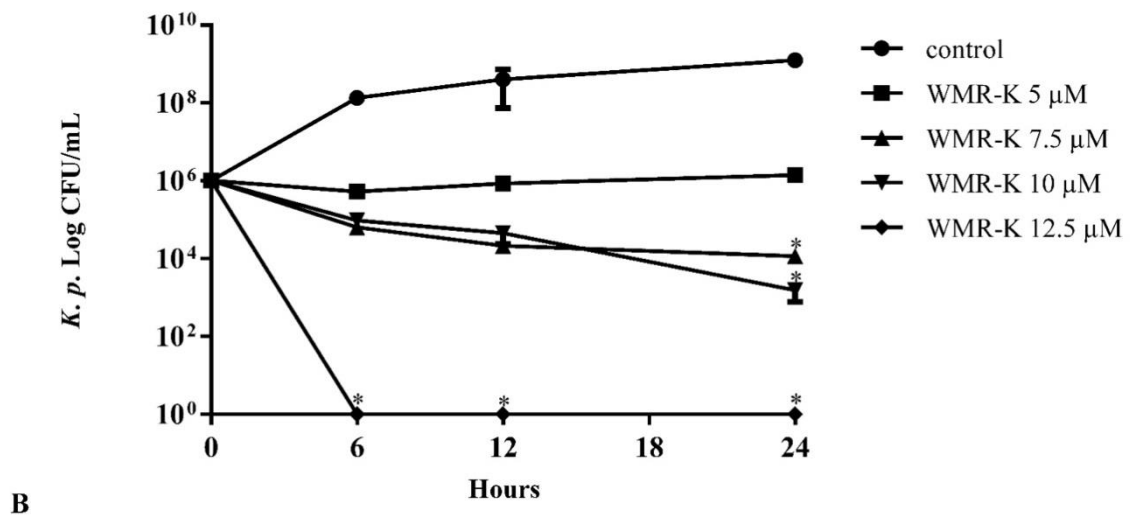

**Figure S1.** Time-kill kinetics of WMR-K against *C. albicans* and *K. pneumoniae*. (A) Growth curves generated using *C. albicans* cells treated with WMR-K. (B) Growth curves generated using *K. pneumoniae* cells treated WMR-K. (n=3  $\pm$  SD); \* p < 0.05 (two-way ANOVA followed by Tukey's post hoc test).

**Table S1.** Inhibition effects of WMR-K at different concentrations on mono and poly-microbial biofilms of *K. pneumoniae* and *C. albicans*. *n* = number of replicates; SD = standard deviation.

| Inhibition effects of WMR-K                      |                  |          |          |      |
|--------------------------------------------------|------------------|----------|----------|------|
| Culture                                          | WMR-K [ $\mu$ M] | <i>n</i> | Mean (%) | SD   |
| <i>K. pneumoniae</i>                             | 5.0              | 3        | 30.00    | 9.89 |
|                                                  | 7.5              | 3        | 73.50    | 3.53 |
|                                                  | 10               | 3        | 93.76    | 3.90 |
| <i>C. albicans</i>                               | 5.0              | 3        | 12.01    | 1.39 |
|                                                  | 7.5              | 3        | 38.50    | 3.53 |
|                                                  | 10.0             | 3        | 55.5     | 4.94 |
|                                                  | 12.5             | 3        | 73.00    | 5.65 |
|                                                  | 25.0             | 3        | 80.00    | 1.41 |
|                                                  | 50.0             | 3        | 87.01    | 1.39 |
| Dual species<br><i>C. albicans/K. pneumoniae</i> | 5.0              | 3        | 18.5     | 4.94 |
|                                                  | 7.5              | 3        | 31.00    | 2.82 |
|                                                  | 10.0             | 3        | 63.92    | 2.93 |
|                                                  | 12.5             | 3        | 78.00    | 1.41 |
|                                                  | 25.0             | 3        | 87.50    | 2.12 |
|                                                  | 50.0             | 3        | 89.50    | 3.53 |

**Table S2.** Eradication effects of WMR-K at different concentrations on mono and poly-microbial biofilms of *K. pneumoniae* and *C. albicans*. *n* = number of replicates; SD = standard deviation.

| Eradication                                      |                  |          |       |      |
|--------------------------------------------------|------------------|----------|-------|------|
| Culture                                          | WMR-K [ $\mu$ M] | <i>n</i> | Mean  | SD   |
| <i>K. pneumoniae</i>                             | 5.0              | 3        | 42.00 | 8.48 |
|                                                  | 7.5              | 3        | 54.50 | 4.94 |
|                                                  | 10               | 3        | 81.59 | 7.90 |
| <i>C. albicans</i>                               | 5.0              | 3        | 0.00  | 0.00 |
|                                                  | 7.5              | 3        | 1.00  | 1.41 |
|                                                  | 10.0             | 3        | 20.91 | 4.11 |
|                                                  | 12.5             | 3        | 32.50 | 4.94 |
|                                                  | 25.0             | 3        | 48.00 | 5.65 |
|                                                  | 50.0             | 3        | 67.64 | 3.73 |
| Dual species<br><i>C. albicans/K. pneumoniae</i> | 5.0              | 3        | 0.00  | 0.00 |
|                                                  | 7.5              | 3        | 14.50 | 3.53 |
|                                                  | 10.0             | 3        | 39.72 | 2.43 |
|                                                  | 12.5             | 3        | 58.00 | 1.41 |
|                                                  | 25.0             | 3        | 70.82 | 6.82 |
|                                                  | 50.0             | 3        | 82.50 | 4.94 |
